# Supplementary material for: Vertical stratification driven nutrient ratios to regulate phytoplankton community structure in the oligotrophic western Pacific Ocean
Source: Copernicus journal article supplement (doi:10.5194/os-2021-67), 2021-07-06

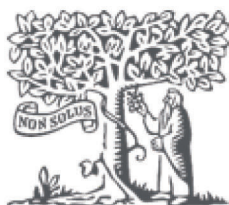

ELSEVIER

# Certificate of Elsevier Language Editing Services

**The following article was edited by Elsevier Language Editing Services:**

**"Vertical stratification driven nutrient ratios to regulate phytoplankton  
community structure in the oligotrophic western Pacific Ocean"**

**Authored by:  
ZhuoChen**

**Date: 11-Aug-2021**

**Serial number: LEEX-15215-E4F1D0CAC006**

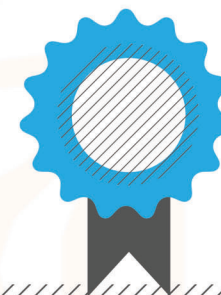

Supplement: Supplementary file [file os-2021-67-AC1-supplement.zip]
